# Supplementary material for: Role of Routine Medical Checkups in Enhancing Health Security among the Elderly in Katsina, Nigeria
Source: Research Square preprint supplement (doi:10.21203/rs.3.rs-8890650/v1), 2026-02-24
Supplement: Supplementary file 1 [file 676e731a52b42f54c9cfe882.docx]

**APPENDIX II**

**USMANU DANFODIYO UNIVERSITY, SOKOTO**

**SCHOOL OF POSTGRADUATE STUDIES**

**FACULTY OF SOCIAL SCIENCES**

**DEPARTMENT OF SOCIOLOGY**

**QUESTIONNAIRE FOR THE ELDERLY**

**Questionnaire No: .......................... LGA: ...............................................**

**Area: ................................................. Date: ...............................................**

Dear respondent,

**Introduction:** I am a postgraduate student of the above Department and Institution; conducting a research on ‘Factors Influencing RMC Utilization among the Elderly in Katsina State, Nigeria’. You are selected to participate in the research. I hope you will agree to respond to the questions since your responses are important. If you come across any question you do not want to answer, ignore it and go on to the next question or you can stop responding to the questions at any time. Please, your cooperation is highly needed.

**Confidentiality:** You will be required to respond to some very personal questions, which some people find difficult to answer. Your responses are completely confidential. Your name or identity will not be written on this questionnaire, and will never be used in any way to identify you.

**Instruction: Choose from the provided response options**

**Section 1: Background characteristics (In this section, we would like to know just a little about you)**

| **S/No.** | **Questions and filters** | **Code and Response Options** |
| --- | --- | --- |
| **101.** | Local Government Area | 1. Daura [ ] 2. Funtua [ ] 3. Katsina [ ] |
| **102.** | Age | 1. 60 – 65 years [ ]  2. 66 years and older [ ] |
| **103.** | Religion | 1. Islam [ ] 2. Christianity [ ] 3. African traditional religion [ ] |
| **104.** | Sex | 1. Male [ ] 2. Female [ ] |
| **105.** | Which term best describes your currentrelationship status? | 1. Single [ ] 2. Married [ ] 3. Divorced [ ] 4. Separated [ ] 5. Widowed [ ] |
| **106.** | Nature of marriage | 1. Monogamous [ ] 2. Polygynous [ ] 3. Not in a union [ ] |
| **107.** | Ethnicity | 1. Fulani [ ] 2. Hausa [ ] 3. Igbo [ ] 4. Yoruba [ ] 5. **Others, specify……………..** |
| **108.** | Educational qualification **(Completed)** | 1. No formal education [ ] 2. Religious education only [ ] 3. Primary education [ ] 4. Secondary education [ ] 5. Post-secondary education [ ] |
| **109.** | Do you have independent source of income? | 1. Yes [ ] 2. No [ ] |

| **110.** | Employment status | 1. Artisan [ ] 2. Civil servant [ ] 3. Farming [ ] 4. Full-time housewife [ ] 5. Retired [ ] 6. Tradesman/woman [ ] 7. Unemployed [ ] |
| --- | --- | --- |
| **111.** | Average income per month | 1. Below N5,000 [ ] 2. N5,000 – N25,000 [ ] 3. N26,000 – N45,000 [ ] 4. N46,000 and above [ ] |
| **112.** | Number of children **(Presently alive)** | 1. 1 – 4 Children [ ] 2. 5 – 8 Children [ ] 3. 8 Children and above [ ] |
| **113.** | Which best describes your currentliving arrangements **(primary place of residence)**? | 1. In own home [ ] 2. In a rented apartment [ ] 3. In an IDP camp [ ] 4. With a family member [ ] 5. In our family house [ ] |
| **114.** | Who looks after you? **[multiple options possible]** | 1. I look after myself [ ] 2. My wife/wives [ ] 3. My husband [ ] 4. My children [ ] 5. Grandchildren [ ] 6. Other family members [ ] 7. The community members [ ] |
| **115.** | Do you rely on others for care and support? | 1. Yes [ ] 2. No [ ] |
| **116.** | Which of these chronic symptoms did you notice in the last 4 weeks? **[multiple options]** | 1. Headache [ ] 2. Backache [ ] 3. Allergy [ ] 4. Body/joint pains [ ] 5. Constipation [ ] 6. Cough [ ] 7. Sore throat [ ] 8. Eye problems [ ] 9. Runny nose [ ] 10. Fever [ ] 11. Food poisoning [ ] 12. None of the above [ ] 13. **Specify other symptoms..........** |
| **117.** | Which of these chronic conditions have you suffered in the last 3 months? **[multiple options possible]** | 1. High blood pressure [ ] 2. Low blood pressure [ ] 3. Joint problem [ ] 4. Back pain [ ] 5. Erectile dysfunction [ ] 6. Cardiovascular disease [ ] 7. Diabetes [ ] 8. Cancer [ ] 9. Asthma [ ] 10. Epilepsy/psychiatry [ ] 11. HIV/AIDS [ ] 12. None of the conditions [ ] 13. **Specify other disabilities.........** |
| **118.** | Residence | 1. Town [ ] 2. Village [ ] |
| **119.** | Do you have a health insurance? | 1. Yes [ ] 2. No [ ] **Skip to 201** |

| **120.** | If yes, how effective is it? | 1. Very effective [ ] 2. Moderately effective [ ] 3. Somewhat effective [ ] 4. Not very effective [ ] 5. Not effective at all [ ] 6. I do not know/not sure [ ] |
| --- | --- | --- |
| **121.** | Does your health insurance plan cover routine medical checkups? | 1. Yes [ ] 2. No [ ] 3. I do not know [ ] 4. I do not have a health insurance plan[ ] |

**Section 2: Social construction of RMC (In this section, we would like to know how the elderly socially construct RMC)**

| **S/No.** | **Questions and filters** | **Code and Response Options** |
| --- | --- | --- |
| **201.** | Have you ever heard of routine medical checkup? | 1. Yes [ ] 2. No [ ] **Skip to 203** |
| **202.** | What was the source of the information? | 1. Friends/relatives [ ] 2. Radio/Television [ ] 3. Posters/banners [ ] 4. Loudspeakers [ ] 5. Internet/social media [ ] 6. Mobile SMS [ ] 7. Health workers [ ] 8. **Others, specify...................................** |
| **203.** | Have you ever practiced routine medical checkup **before** you reach the age of 60? | 1. Yes [ ] 2. No [ ] |
| **204.** | **After** you turned 60 years of age, did you ever have a routine medical checkup? | 1. Yes [ ] **Skip to 206** 2. No [ ] |
| **205.** | Why have you not had routine medical checkup after you turned 60 years? | 1. I do not know about it [ ] 2. I do not think it is necessary [ ] 3. Fear of being diagnosed with a chronic condition [ ] 4. Not close to healthcare facility [ ] 5. The cost incurred in the process [ ] 6. Poor services at the health facility [ ] |
| **206.** | If yes, what motivate you to undergo routine medical checkups? | 1. Convenient health screening site [ ] 2. Low cost of the services [ ] 3. Skills of the health workers [ ] 4. Advice of healthcare providers [ ] 5. My present health condition requires regular checks [ ] 6. **Others, specify.......................** |
| **207.** | Does any of your friends/relatives practice routine medical checkups? | 1. Yes [ ] 2. No [ ] 3. I do not know [ ] |
| **208.** | What prevents the elderly from going for routine medical checkups? **[multiple options possible]** | 1. Afraid to discover a serious medical condition [ ] 2. Knowledge of impending death would lead to anguish and anxiety [ ] 3. No adequate money [ ] 4. Inadequate/lack of knowledge about routine medical checkup [ ] 5. Health screening are a waste of time [ ] 6. Procedures involved are too complicated and difficult to understand [ ] 7. Certain procedures lead to physical pain, emotional pain or discomfort [ ] 8. Negative attitude and behaviours of healthcare workers [ ] 9. Negative experience during a previous checkup [ ] 10. Long waiting time [ ] 11. Location of the facility [ ] 12. When people are quite healthy [ ] |
| **209.** | Do you believe that some elderly people avoid practicing routine medical checkups because they feel it is better not to know any underlying condition in them? | 1. Strongly agree [ ] 2. Agree [ ] 3. Disagree [ ] 4. Strongly disagree [ ] 5. Undecided [ ] |
| **210.** | Do you consider yourself as less in control of your life, environment and circumstances? | 1. Yes [ ] 2. No [ ] |
| **211.** | Who do you think should be going for routine medical checkups? | 1. The elderly [ ] 2. The youth [ ] 3. Children [ ] 4. Pregnant women [ ] 5. Only those living with chronic diseases [ ] 6. Everybody [ ] 7. I do not know [ ] |
| **212.** | What type of medical checkup are you aware of? **[multiple options possible]** | 1. Eye check [ ] 2. Dental check [ ] 3. Blood sugar [ ] 4. Lipid profile [ ] 5. Urine test [ ] 6. Heart function test [ ] 7. Kidney function test [ ] 8. Liver function test [ ] 9. Blood pressure [ ] 10. Pulse rate [ ] 11. Cancer screening [ ] 12. HIV retroviral screening [ ] 13. General medical checkup [ ] 14. I do not know any [ ] |
| **213.** | What are the cultural beliefs around ageing and RMCs in this community? | 1. Ageing comes with related diseases that does not require RMCs [ ] 2. With ageing, there is need for RMCs [ ] 3. No cultural beliefs around ageing and RMCs in this community [ ] 4. I do not know [ ] |
| **214.** | Do you think fear of diagnosing a chronic condition prevents the elderly from practicing routine medical checkups? | 1. Strongly agree [ ] 2. Agree [ ] 3. Disagree [ ] 4. Strongly disagree [ ] 5. Undecided [ ] |

**Section 3: Knowledge and perceived benefits of RMCs (In this section, we would like to get your opinion on the knowledge you have on RMCs and its benefits)**

| **S/No.** | **Questions and filters** | **Code and Response Options** |
| --- | --- | --- |
| **301.** | What motivates people, especially the elderly, to go for routine medical checkups? | 1. Is an effective way of determining health status of service users [ ] 2. Can help diagnose and treat chronic diseases at early stage [ ] 3. Reduce future healthcare costs [ ] 4. Increase the chance of successful treatment [ ] 5. To improve health and quality of life [ ] 6. To have a rest [ ] 7. I do not know [ ] 8. **Others, specify................................** |
| **302.** | What is the major source of routine medical checkups in your area? | 1. Federal medical centre/TH [ ] 2. General hospital [ ] 3. Specialist hospital [ ] 4. Primary healthcare centre [ ] 5. Private hospital/clinic [ ] 6. Chemists/medicine stores [ ] 7. Traditional healers [ ] 8. **Others, specify..............................** |
| **303.** | Do you believe in the existence of age-related non-communicable diseases? | 1. Yes [ ] 2. No [ ] |
| **304.** | Have you ever been exposed to the experience of pain and the deaths of other elderlies as a result of age-related diseases? | 1. Yes [ ] 2. No [ ] |
| **305.** | I am willing to attend routine medical checkups because it is necessary and beneficial | 1. Strongly agree [ ] 2. Agree [ ] 3. Disagree [ ] 4. Strongly disagree [ ] 5. Undecided [ ] |
| **306.** | Do you know anyone that his health status was improved as a result of RMCs? | 1. Yes [ ] 2. No [ ] |
| **307.** | Routine medical checkups reduces stress faced by members of the family of an elderly living with a chronic disease | 1. Strongly agree [ ] 2. Agree [ ] 3. Disagree [ ] 4. Strongly disagree [ ] 5. Undecided [ ] |
| **308.** | What do you believe are the constraints or impediments to accessing routine medical checkups? **[multiple options possible]** | 1. Long distance to the facility [ ] 2. No adequate money [ ] 3. Lack/inadequate knowledge of routine medical checkups [ ] 4. Lack of social support [ ] 5. Service unavailable [ ] 6. Self-treatment/Home medication [ ] |

**Section 4: The practice of RMCs and facilitation of the health status of the elderly (In this section, we would like to know how the practice of RMCs among the elderly facilitates their health status)**

| **S/No.** | **Questions and filters** | **Code and Response Options** |
| --- | --- | --- |
| **401.** | In the past 12 months, did you have routine medical checkup? | 1. Yes [ ] 2. No [ ] **Skip to 403** |
| **402.** | In the past 12 months, how often do you visit healthcare facilities for medical checkup to maintain a good health status? | 1. Weekly [ ] 2. Twice in a month [ ] 3. Monthly [ ] 4. Once in a year [ ] 5. Twice in a year [ ] 6. Whenever I fall sick [ ] 7. I cannot remember [ ] 8. I have never practiced RMC [ ] |
| **403.** | How will you rate your health status? | 1. Good/fair/poor [ ] 2. Excellent/very good [ ] 3. I do not know [ ] |
| **404.** | Do you think routine medical checkups will improve your health status? | 1. Yes [ ] 2. No [ ] |
| **405.** | Routine medical checkup is practiced among members of my community | 1. Always [ ] 2. Often [ ] 3. Occasionally [ ] 4. Never [ ] 5. I do not know [ ] |
| **406.** | Do you encourage your family members and friends to go for routine medical checkups? | 1. Yes [ ] 2. No [ ] |
| **407.** | Will you recommend routine medical checkups to your family members and friends? | 1. Yes [ ] 2. No [ ] |
| **408.** | How often does your partner visit healthcare facilities for medical checkup? | 1. Weekly [ ] 2. Twice in a month [ ] 3. Monthly [ ] 4. Once in a year [ ] 5. Twice in a year [ ] 6. Whenever he/she fall sick [ ] 7. My partner do not go to hospitals for medical checkups [ ] 8. I do not have a partner [ ] |
| **409.** | Have you had a medical checkup within the past year? | 1. Yes [ ] 2. No [ ] **Skip to 413** |
| **410.** | What type of medical checkup have you done in the past year? **[multiple options possible]** | 1. Eye check [ ] 2. Dental check [ ] 3. Urine test [ ] 4. Kidney Function Test [ ] 5. Liver Function Test [ ] 6. Lipid Profile [ ] 7. Heart Function Test [ ] 8. Blood Sugar test [ ] 9. Breast Examination [ ] 10. Blood Pressure [ ] 11. Pulse Rate [ ] 12. Temperature Check [ ] 13. HIV Retroviral Screening [ ] 14. General Medical Checkup[ ] |
| **411.** | Who recommended the medical checkup? | 1. Physician/Doctor [ ] 2. Nurse [ ] 3. Other health professionals [ ] 4. Self [ ] 5. Family members/friends [ ] 6. Traditional healer [ ] 7. **Others, specify..............................** |
| **412.** | I have had checkup for hypertension | 1. Always [ ] 2. Often [ ] 3. Occasionally [ ] 4. Never [ ] 5. I do not know [ ] |
| **413.** | I have had checkup for blood sugar level | 1. Always [ ] 2. Often [ ] 3. Occasionally [ ] 4. Never [ ] 5. I do not know [ ] |
| **414.** | During the past 3 months, when having any symptoms or illnesses, what did you do to handle them? | 1. Visited healthcare facility [ ] **Skip to 501** 2. Self-treatment [ ] 3. Prayers [ ] 4. Nothing [ ] |
| **415.** | If self-treatment, what type of medicine did you use? | 1. Analgesic [ ] 2. Anti-hypertensive drugs [ ] 3. Anti-glycaemic agents [ ] 4. Pain relievers [ ] 5. Antibiotics [ ] 6. Self-brewed herbs [ ] 7. **Others, specify........................** |
| **416.** | What criteria did you used to purchase the medicine for self-treatment? | 1. Used drugs available at home [ ] 2. Describing symptoms to pharmacists [ ] 3. Remember drug’s name using prescription in previous medical examination [ ] 4. Used herbs I once used or recommended by friends and relatives [ ] 5. Suggested by friends/family members [ ] |
| **417.** | Why did you opt for self-treatment? | 1. They are mild symptoms [ ] 2. Not having time for visiting health facility [ ] 3. Having previous experience with similar health problems [ ] 4. Medical facility is far away [ ] 5. For confidentiality [ ] 6. Availability of the herbs [ ] 7. Lack of money [ ] 8. **Others, specify........................** |

**Section 5: The interface between social construction of RMCs and elderly identity transition**

| **S/No.** | **Questions and filters** | **Code and Response Options** | |
| --- | --- | --- | --- |
| **501.** | What defines an elderly person in this community? | 1. Age [ ] 2. Physical appearance [ ] 3. Age and physical appearance [ ] 4. Social roles played by an individual [ ] | |
| **502.** | What is the nearest medical facility from your home? | 1. Federal medical centre/TH [ ] 2. A specialist hospital [ ] 3. General hospital [ ] 4. Primary healthcare centre [ ] 5. Chemists/medicine stores [ ] 6. Traditional healers [ ] | |
| **503.** | How far is the nearest facility from your home? | 1. Less than 5 minutes-walk/drive [ ] 2. 5-15 minutes’ walk/drive [ ] 3. More than 15 minutes-walk/drive[ ] | |
| **504.** | High cost of routine medical checkup makes many elderly shy away from checking their health status regularly | 1. Strongly agree [ ] 2. Agree [ ] 3. Disagree [ ] 4. Strongly disagree [ ] 5. Undecided [ ] | | |
| **505.** | Are you willing to participate in routine medical checkups in the future? | 1. Yes [ ] 2. No [ ] **Skip to 507** 3. Undecided [ ] | | |
| **506.** | What type of check will you prefer to practice? **[multiple response possible]** | 1. Eye check [ ] 2. Dental check [ ] 3. Urine test [ ] 4. Kidney Function Test [ ] 5. Liver Function Test [ ] 6. Lipid Profile [ ] 7. Heart Function Test [ ] 8. Blood Sugar test [ ] 9. Breast Examination [ ] 10. Blood Pressure [ ] 11. Pulse Rate [ ] 12. Temperature Check [ ] 13. HIV Retroviral Screening [ ] 14. General Medical Check-up[ ] 15. None of the checks [ ] 16. **Other checks [ ]** | | |
| **507.** | Have you ever witnessed a situation where the elderly is blamed for an illness that he is diagnosed with? | 1. Yes [ ] 2. No [ ] | | |
| **508.** | What form of stereotype does the elderly face in this community? **[multiple response possible]** | 1. Seen as weak and dependent[ ] 2. Helpless and vulnerable [ ] 3. Infirm and inactive [ ] 4. Unproductive and Excessively consuming resources [ ] 5. Disconnected from the younger population [ ] 6. They do not face any stereotype [ ] 7. **Other forms of stereotypes** | | |
| **509.** | What do you think happens when an elderly is diagnosed with age-related disease? | 1. His/her status become jeopardized [ ] 2. Lose of sense of self [ ] 3. Accept it as a transient to death [ ] 4. Practice RMC to manage the disease [ ] 5. The elderly disclose their illnesses/aging experiences to get help [ ] 6. They make lifestyle changes to deal with their illnesses or adapt to the change [ ] 7. They experience post-diagnosis depression [ ] | | |
| **510.** | The diagnosed elderly are blamed for their illness because…….. | 1. It is caused by particular behaviours of the diagnosed [ ] 2. The diagnosed elderly is not blamed for his/her condition [ ] | | |
| **511.** | What do you think will be the result of blaming the elderly for his/her diagnosed age-related disease? | 1. Increased post-diagnosis depression [ ] 2. Social stigma [ ] 3. Make the elderly to practice RMC [ ] 4. The elderly become reluctant and be indifferent on their condition [ ] |
| **512.** | Why do you think some elderly people do not practice RMCs? | 1. Because they think that they are about to die [ ] 2. They are retired and tired [ ] 3. Ageing is a natural process that come with a sloppy health [ ] 4. Lack of knowledge of RMC [ ] 5. Financial constraint [ ] |
| **513.** | What do you think should be done to motivate the elderly to continue participating in routine medical checkups? **[multiple response possible]** | 1. Provide free healthcare screening for the elderly [ ] 2. Introduce mobile screening points for the elderly [ ] 3. Reduce waiting time in the hospitals [ ] 4. Change attitude and behaviours of healthcare workers [ ] 5. Massive campaigns and enlightenment on the importance of RMCs [ ] 6. **Others, specify.....................................** |
| **514.** | What is your major source of health information? | 1. Friends/relatives [ ] 2. Radio [ ] 3. Television [ ] 4. Posters/banners [ ] 5. Town announcers [ ] 6. Internet/social media [ ] 7. Mobile SMS [ ] 8. Health workers [ ] 9. Traditional leaders [ ] 10. Religious leaders [ ] 11. **Others, specify.............................** |

**Thank you!**

**APPENDIX II (IDI GUIDE)**

**USMANU DANFODIYO UNIVERSITY, SOKOTO**

**SCHOOL OF POSTGRADUATE STUDIES**

**FACULTY OF SOCIAL SCIENCES**

**DEPARTMENT OF SOCIOLOGY**

**Individual In-depth Interview Guide for the Elderly**

**S/No: ................................................ LGA: ...............................................**

**Area: ................................................. Date: ...............................................**

Dear respondent,

**Introduction:** I am a postgraduate student of the above Department and Institution; conducting a research on ‘factors influencing RMC utilization among the elderly in Katsina State, Nigeria’. You are selected to participate in the research. I hope you will agree to respond to the questions since your responses are important. If you come across any question you do not want to answer, ignore it and go on to the next question or you can stop responding to the questions at any time. Please, your cooperation is highly needed.

**Confidentiality:** You will be required to respond to some very personal questions, which some people find difficult to answer. Your responses are completely confidential. Your name or identity will not be written on this guide, and will never be used in any way to identify you.

***Instructions: The interview will begin with a verbal informed consent process involving acknowledgement that the participant agrees that the study has been explained to them and that all their questions have been satisfactorily answered, that they have given their consent to be interviewed, and to have the interview audio recorded***

**SECTION 1: BACKGROUND CHARACTERISTICS (In this section, we would like to know just a little about you)**

| **S/No.** | **Questions** |
| --- | --- |
|  | How long have you lived in [name of village/town/city]? |
|  | What is your age?  *[Probe]*  ***If cannot answer, ask for year of birth.**  ***If still cannot answer:** then ask about relevant historical events that happened at the time of their birth, who was the [president/ /state/district leader/LGA chairman]; if there is an age mate or age group system you can ask about that to determine age group. |
|  | What is your religion? |
|  | What is your tribe? |
|  | Did you attend formal schooling?  *[Follow up questions]*  **If answer is yes, then ask: What is the highest level of education you completed?* |
|  | What is the main kind of work that you do?  *[Follow up question]*  **What else do you do to earn money?* |
|  | What is your marital status? |
|  | Number of children |
|  | Which best describes your currentliving arrangements (primary place of residence)?  *[Probe]*  **In my house*  **In a rented apartment*  **In an IDP camp*  **In our family house* |
|  | Which chronic condition have you suffered in the last 3 months?  *[Probe]*  ******* *High/low blood pressure*  ********Cardiovascular disease*  ********Diabetes*  ********Cancer*  ********Asthma*  ********Epilepsy/psychiatry*  ********HIV/AIDS, etc.* |
|  | Do you have a health insurance plan?  *[Probe]*  *[Follow up questions, if not already answered]*  ********If yes, does your health insurance plan cover routine medical checkups?*  ********If no, how do you take care of the bills whenever you go for medical checkups?* |

**SECTION 2: SOCIAL CONSTRUCTION OF RMCs (In this section, we would like to know how the elderly socially construct RMCs)**

Thank you so much for sharing the earlier information you provided with me. I would like to continue by asking you some more questions about yourself

1. Have you ever heard of routine medical checkup?

*[Probe]*

*[Follow up questions, if not already answer*e*d]*

- *If yes, what was the source of the information?*

1. Can you please tell me the type of medical checkup you are aware of?
2. After you turned 60 years of age, did you ever have a routine medical checkup?

*[Probe]*

*[Follow up questions, if not already answered]*

- ***If yes:*** *Can you tell me why you had the checkup? What motivated you?*
- ***If no:*** *Can you tell me why you did not?*

1. Does any of your a friends or relatives go for routine checkups?

*[Probe]*

*[Follow up questions, if not already answer*e*d]*

- ***If yes****, why does he/her go for it?*

1. What factor(s) do you think prevent the elderly from going for routine medical checkups?

*[Probe]*

*[Follow up questions, if not already answered]*

- *How about concerns about fear of what may be discovered?*
- *How about concerns about belief/value system?*
- *How about difficulty in accessing the facility?*
- *How about concerns about the attitude of healthcare workers?*
- *How about the cost of the services?*

1. Do you think the fear of detecting a chronic disease deter the elderly from practicing RMC?
2. How does culture and social orientation define ageing process and age-related diseases?

**SECTION 3: KNOWLEDGE AND PERCEIVED BENEFITS OF RMCs (In this section, we would like to get your opinion on the knowledge you have on RMCs and its benefits)**

1. Why do you think people especially the elderly go for routine medical checkups?

*[Probe]*

*[Follow up questions, if not already answered]*

- *What is your opinion on diagnosing and treating chronic diseases at early stage?*
- *What about reduction of future healthcare costs?*
- *What is your opinion on reducing the burden on family of the elderly?*

1. What would you say about the existence of age-related non-communicable diseases?
2. Can you tell us about anyone that his/her health status was improved as a result of RMCs?
3. What is the nearest health facility from your home?

*[Probe]*

*[Follow up questions, if not already answer*e*d]*

- *How far is the nearest facility from your home?*
- *What means of transportation do you use to reach the facility?*
- *How difficult or easy is it for you to access the facility?*

**SECTION 4: THE PRACTICE OF RMCs AND FACILITATION OF THE HEALTH STATUS OF THE ELDERLY (In this section, we would like to know how the practice of RMCs among the elderly facilitates and aids their health status)**

1. In the past 12 months, how often do you visit healthcare facilities for medical checkups to maintain a good health status?

*[Probe]*

*[Follow up questions, if not already answer*e*d]*

- *Do you visit healthcare facilities when you fall sick? Why?*

1. What advice do you normally give your family members and friends on medical check-ups/health facility visits?
2. Can you share with us the type of medical checkups you have ever done in the past year?

*[Probe]*

*[Follow up questions, if not already answered]*

- *Why did you go/did not go for it?*
- *Who advise you to go for it?*

1. In your own opinion, how will you rate your health status?

*[Probe]*

*[Follow up questions, if not already answer*e*d]*

- If excellent/good/fair/poor, why?

1. Who do you think should be going for routine medical checkups?

*[Probe]*

*[Follow up questions, if not already answer*e*d]*

- *Probe for the elderly, or the youth, or the children, or women, or person living with chronic diseases, and why?*

1. What is your opinion on the existence of age-related non-communicable diseases?

*[Probe]*

*[Follow up questions, if not already answered]*

- *What would you say about hypertension and diabetes?*

**SECTION 5: THE INTERFACE BETWEEN SOCIAL CONSTRUCTION OF RMCs AND ELDERLY IDENTITY TRANSITION**

1. What defines an elderly person in this community?

*[Probe]*

*[Follow up questions, if not already answered]*

- Age
- Physical appearance
- Social roles played by an individual

1. Have you ever witnessed a situation where the elderly is blamed for an illness that he is diagnosed with?
2. What is your opinion on practicing routine medical checkups in the future?

*[Probe]*

*[Follow up questions, if not already answered]*

- *If willing to practice it in the future, what type of check will you prefer to practice?*
- *If not willing, why?*

1. What are the cultural beliefs around ageing and RMCs?

*[Probe]*

*[Follow up questions, if not already answered]*

- *Ageing comes with related diseases that does not require RMCs*
- *With ageing, there is need for RMCs*

1. Have you ever been exposed to the experience of pain and the deaths of other elderlies as a result of age-related diseases?
2. What form of stereotype does the elderly face in this community?

*[Probe]*

*[Follow up questions, if not already answered]*

- Seen as weak and dependent
- Helpless and vulnerable
- Infirm and inactive
- Unproductive and Excessively consuming resources
- Disconnected from the younger population

1. What do you think happens when an elderly is diagnosed with age-related disease?
2. What do you think should be done to motivate the elderly to participate in routine medical checkups?
3. What is your major source of health information?

*[Probe]*

*[Follow up questions, if not already answered]*

- *How effective and reliable is the source?*
- *What needs to be done to improve the dissemination of health related information to the elderly?*

Thank you very much for the very thoughtful responses you have shared with me today. I really appreciate your patience and feedback. Do you have anything you would like to add that we did not cover during our conversation?

**Thank you very much!**

**APPENDIX III (FGD GUIDE)**

**USMANU DANFODIYO UNIVERSITY, SOKOTO**

**SCHOOL OF POSTGRADUATE STUDIES**

**FACULTY OF SOCIAL SCIENCES**

**DEPARTMENT OF SOCIOLOGY**

**Focus Group Discussion Guide for the Elderly**

**S/No: ................................................ LGA: ...............................................**

**Area: ................................................. Date: ...............................................**

Dear respondent,

**Introduction:** I am a postgraduate student of the above Department and Institution; conducting a research on ‘factors influencing RMC utilization among the elderly in Katsina State, Nigeria’. You are selected to participate in the research. I hope you will agree to respond to the questions since your responses are important. If you come across any question you do not want to answer, ignore it and go on to the next question or you can stop responding to the questions at any time. Please, your cooperation is highly needed.

**Confidentiality:** You will be required to respond to some very personal questions, which some people find difficult to answer. Your responses are completely confidential. Your name or identity will not be written on this guide, and will never be used in any way to identify you.

***Instructions: The interview will begin with a verbal informed consent process involving acknowledgement that the participant agrees that the study has been explained to them and that all their questions have been satisfactorily answered, that they have given their consent to be interviewed, and to have the interview audio recorded***

**SECTION 1: BACKGROUND CHARACTERISTICS (In this section, we would like to know just a little about you)**

| **S/No.** | **Questions** |
| --- | --- |
|  | Which chronic condition have you suffered in the last 3 months? And what is the frequent chronic condition suffered by the elderly people in this community?  *[Probe]*  ******* *High/low blood pressure*  ********Cardiovascular disease*  ********Diabetes*  ********Cancer*  ********Asthma*  ********Epilepsy/psychiatry*  ********HIV/AIDS, etc.* |
|  | Do you have a health insurance plan?  *[Probe]*  *[Follow up questions, if not already answered]*  ********If yes, does your health insurance plan cover routine medical checkups?*  ********If no, how do you take care of the bills whenever you go for medical checkups/visit healthcare facility?* |

**SECTION 2: SOCIAL CONSTRUCTION OF RMCs (In this section, we would like to know how the elderly socially construct RMC)**

Thank you so much for sharing the earlier information you provided with me. I would like to continue by asking you some more questions about yourself

1. Have you ever heard of routine medical checkups?

*[Probe]*

*[Follow up questions, if not already answer*e*d]*

- *If yes, what was the source of the information?*

1. Can you please tell me the type of medical checkup you are aware of?
2. After you turned 60 years of age, did you ever have a routine medical checkup?

*[Probe]*

*[Follow up questions, if not already answered]*

- ***If yes:*** *Can you tell me why you had the checkup? What motivated you?*
- ***If no:*** *Can you tell me why you did not?*

1. Does any of your a friends or relatives go for routine checkups?

*[Probe]*

*[Follow up questions, if not already answer*e*d]*

- ***If yes****, why does he/her go for it?*
- ***If no,*** *why?*

1. What factor(s) do you think prevent the elderly from going for routine medical checkups?

*[Probe]*

*[Follow up questions, if not already answered]*

- *How about concerns about fear of what may be discovered?*
- *How about concerns about belief/value system?*
- *How about difficulty in accessing the facility?*
- *How about concerns about the attitudes of healthcare providers?*
- *How about the cost of the services?*

1. Do you think the fear of detecting a chronic disease deter the elderly from practicing RMC?
2. How does culture and social orientation define ageing process and age-related diseases?

**SECTION 3: KNOWLEDGE AND PERCEIVED BENEFITS OF RMCs (In this section, we would like to get your opinion on the knowledge you have on RMC and its benefits)**

1. Why do you think people especially the elderly go for routine medical checkups?

*[Probe]*

*[Follow up questions, if not already answered]*

- *What is your opinion on diagnosing and treating chronic diseases at early stage?*
- *What about reduction of future healthcare costs?*

1. What can you tell me about anyone that you knew that his/her health status was improved as a result of RMC?
2. What is the nearest health facility from your home?

*[Probe]*

*[Follow up questions, if not already answer*e*d]*

- *How far is the nearest facility from your home?*
- *What means of transportation do you use to reach the facility?*
- *How difficult or easy is it for you to access the facility?*

**SECTION 4: THE PRACTICE OF RMCs AND FACILITATION OF THE HEALTH STATUS OF THE ELDERLY (In this section, we would like to know how the practice of RMCs among the elderly facilitates and aids their health status)**

1. In the past 12 months, how often do you visit healthcare facilities for medical checkups to maintain a good health status?

*[Probe]*

*[Follow up questions, if not already answer*e*d]*

- *Do you visit healthcare facilities when you fall sick? Why?*

1. What advice do you normally give your family members and friends on medical check-ups/health facility visits?
2. Can you share with us the type of medical checkup you have ever done in the past year?

*[Probe]*

*[Follow up questions, if not already answered]*

- *Why did you go/did not go for it?*
- *Who advise you to go for it?*

1. Who do you think should be going for routine medical checkups?

*[Probe]*

*[Follow up questions, if not already answer*e*d]*

- *Why the elderly, or the youth, or the children, or women, or person living with chronic diseases or the mentioned person?*

1. What is your opinion on the existence of age-related non-communicable diseases?

*[Probe]*

*[Follow up questions, if not already answered]*

- *What would you say about hypertension and diabetes?*

**SECTION 5: THE INTERFACE BETWEEN SOCIAL CONSTRUCTION OF RMCs AND ELDERLY IDENTITY TRANSITION**

1. What defines an elderly person in this community?

*[Probe]*

*[Follow up questions, if not already answered]*

- Age
- Physical appearance
- Social roles played by an individual

1. Have you ever witnessed a situation where the elderly is blamed for an illness that he is diagnosed with?
2. What is your opinion on practicing routine medical checkups in the future?

*[Probe]*

*[Follow up questions, if not already answered]*

- *If willing to practice it in the future, what type of check will you prefer to practice?*
- *If not willing, why?*

1. What are the cultural beliefs around ageing and RMCs in this community?

*[Probe]*

*[Follow up questions, if not already answered]*

- *Ageing comes with related diseases that does not require RMC*
- *With ageing, there is need for RMC*

1. Have you ever been exposed to the experience of pain and the deaths of other elderlies as a result of age-related diseases?
2. What form of stereotype does the elderly face in this community?

*[Probe]*

*[Follow up questions, if not already answered]*

- Seen as weak and dependent
- Helpless and vulnerable
- Infirm and inactive
- Unproductive and Excessively consuming resources
- Disconnected from the younger population

1. What do you think happens when an elderly is diagnosed with age-related disease?
2. What do you think should be done to motivate the elderly to participate in routine medical checkups?
3. What is your major source of health information?

*[Probe]*

*[Follow up questions, if not already answered]*

- *How effective and reliable is the source?*
- *What needs to be done to improve the dissemination of health related information to the elderly?*

Thank you very much for the very thoughtful responses you have shared with me today. I really appreciate your patience and feedback. Do you have anything you would like to add that we did not cover during our conversation?

**Thank you very much!**
